# Supplementary material for: Entropically-driven ring-opening metathesis polymerization (ED-ROMP) of macrocyclic olefins prepared from deoxycholic acid to give functionalized polymers
Source: Royal Society of Chemistry journal article supplement (doi:10.1039/c5py00272a), 2015-01-01
Supplement: c5py00272a1.pdf [file c5py00272a1.pdf]

*ESI for the paper*

**Entropically-driven Ring-opening Metathesis Polymerization  
(ED-ROMP) of Macrocyclic Olefins Prepared from  
Deoxycholic Acid to give Functionalized Polymers**

Philip Hodge\* and Abdel Chakiri

Department of Chemistry, University of Manchester, Oxford Road, Manchester, M13 9PL, UK

---

This ESI describes the syntheses of macrocycles discussed in the paper. The compound/formulae numbers remain the same, as do the reference numbers.

In the case of macrocycles **1** and **9** the syntheses involved three steps. (i) The appropriate bile acid was reacted with undec-10-enol in the presence of a catalytic amount of concentrated sulphuric acid;<sup>7</sup> (ii) the product from the first step was acylated by reaction with undec-10-enoyl chloride in the presence of pyridine;<sup>7</sup> (iii) the diester was then subjected to ring-closing metathesis using Grubbs First Generation catalyst.<sup>7</sup>

The syntheses of macrocycles **10** and **11** involved first preparing the methyl and *t*-butyl esters of deoxycholic acid (**12**).<sup>18</sup> The esters were then (i) acylated by reaction with undec-10-enoyl chloride in the presence of pyridine;<sup>7</sup> and (ii) the triesters obtained were subjected to ring-closing metathesis using Grubbs First Generation catalyst.<sup>7</sup>

***Experimental Details***

The materials and instruments were as indicated in the paper and reference 5.

## 1. Synthesis of Macrocycle 1

This macrocycle has been prepared before by Gautrot and Zhu.<sup>7</sup> The procedure was repeated without problem. Column chromatography of the crude reaction product gave cyclic monomer **1** (*E*- and *Z*-isomers) as white crystals (80%); m.p. 123 – 128 °C (lit.,<sup>7</sup> 119.6 °C by DSC); FT-IR (KBr)  $\nu_{\max}$  1733  $\text{cm}^{-1}$  (C=O); <sup>1</sup>H NMR (500 MHz, CDCl<sub>3</sub>,  $\delta$ , ppm) 5.38 (m, 2 H, CH=), 4.72 (m, 1 H, 3 $\beta$ -CH), 4.08 (m, 2 H, CH<sub>2</sub>OCO), 2.40 – 2.11 (m, 4 H, 23CH<sub>2</sub> and CH<sub>2</sub>CO), 2.0 – 0.9 (m, 56 H, various CH), 0.92 (s, 3 H, C19), 0.90 (d, *J* = 10 Hz, 3 H, C21 methyl), 0.64 (s, 3 H, C18); MS MALDI ToF 690, C<sub>44</sub>H<sub>74</sub>O<sub>4</sub>Na<sup>+</sup> requires 689.6. Another column fraction was, by MALDI ToF, mainly C1 (690) with much smaller amounts of C2 (1357) and (C3) 2028.

## 2. Synthesis of Macrocycles 9

*Undecenyl deoxycholate* was prepared by reacting deoxycholic acid with an excess of undec-10-enyl alcohol in the presence of a catalytic amount of concentrated sulphuric acid. This gave the desired product as a clear gum (88%) with FT-IR (KBr)  $\nu_{\max}$  3610  $\text{cm}^{-1}$  (OH), 1736  $\text{cm}^{-1}$  (C=O); <sup>1</sup>H NMR (400 MHz, CDCl<sub>3</sub>,  $\delta$ , ppm) 5.81 (m, 1 H, CH=), 4.94 (m, 2 H, =CH<sub>2</sub>), 4.03 (m, 2 H, CH<sub>2</sub>OCO), 3.98 (m, 1 H, 12 $\beta$ -H), 3.61 (m, 1 H, 3 $\beta$ -H), 2.38 (m, 1 H, 23-H), 2.23 (m, 1 H, 23-H), 2.00 (m, 2 H, CH<sub>2</sub>CO<sub>2</sub>), 1.9 – 1.0 (m, 40 H, various CH), 0.97 (d, *J* = 8 Hz, 3H, C21 methyl), 0.91 (s, 3H, C19), 0.67 (s, 3H, C18). Calculated for C<sub>35</sub>H<sub>60</sub>O<sub>4</sub>: C, 77.15; H, 11.10 %. Found: C, 76.93; H, 10.92 %.

*Undecenyl undecanoyldeoxycholate* was prepared by reacting the above ester with undec-10-enoyl chloride in the presence of pyridine.<sup>22</sup> It was obtained as white crystals (89%); mp 58 – 60 °C; FT-IR (KBr)  $\nu_{\max}$  1730  $\text{cm}^{-1}$  (C=O); <sup>1</sup>H NMR (300

MHz, CDCl<sub>3</sub>,  $\delta$ , ppm) 5.80 (m, 2 H, CH=), 4.97 (m, 4 H, =CH<sub>2</sub>), 4.71 (m, 1 H, 3 $\beta$ -H), 4.05 (m, 2 H, CH<sub>2</sub>OCO), 4.01 (m, 1 H, 12 $\beta$ -H), 2.30 (m, 1 H, 23-H), 2.23 (m, 3 H, 23-H and CH<sub>2</sub>CO<sub>2</sub>), 2.03 (m, 2 H, CH<sub>2</sub>CO<sub>2</sub>), 1.9 – 1.0 (m, 53 H, various CH), 0.97 (d,  $J$  = 8 Hz, 3H, C21 methyl), 0.91 (s, 3H, C19), 0.67 (s, 3H, C18). C<sub>46</sub>H<sub>78</sub>O<sub>5</sub> requires C, 77.69; H, 11.06 %. Found: C, 77.39; H, 10.88 %.

MCOs **9** were prepared by ring-closing metathesis using the general procedure described by Gautrot and Zhu.<sup>7</sup> Column chromatography of the crude product gave MCOs **9** as a pale fawn glass (78 %); FT-IR (KBr)  $\nu_{\max}$  3100 br. (OH), 1731 cm<sup>-1</sup> (C=O); <sup>1</sup>H NMR (400 MHz, CDCl<sub>3</sub>,  $\delta$ , ppm) 5.33 (m, 2 H, CH=, *E*- and *Z*-isomers), 4.70 (m, 1 H, 3 $\beta$ -CH), 4.00 (m, 2 H, CH<sub>2</sub>OCO), 3.90 (m, 1 H, 12 $\beta$ -H), 2.35 – 2.10 (m, 4 H, <sup>23</sup>CH<sub>2</sub> and CH<sub>2</sub>CO), 2.0 – 1.0 (m, 55 H, various CH), 0.92 (d,  $J$  = 10 Hz, 3 H, C21 methyl), 0.90 (s, 3 H, C19), 0.64 (s, 3 H, C18); MS MALDI ToF 707, C<sub>44</sub>H<sub>74</sub>O<sub>5</sub>Na<sup>+</sup> requires 706.0. Also peaks due to C2 (1390) and C3 (2072). SEC: C1, 85%, C2, 13%, and C3, 2%. C<sub>44</sub>H<sub>74</sub>O<sub>5</sub> requires C, 77.37; H, 10.92 %. Found: C, 77.09; H, 10.68 %.

### 3. Synthesis of Macrocycles **10**

*Methyl deoxychlolate* was prepared as described by Gangwal *et al.*<sup>18a</sup> It had m.p. 112 - 118 °C (lit.,<sup>18a</sup> 120 °C).

*Methyl Diundecanolyldoexychololate*. This compound was obtained in the form of a foam (102%) with FT-IR (KBr)  $\nu_{\max}$  1739 cm<sup>-1</sup> (C=O); <sup>1</sup>H NMR (300 MHz, CDCl<sub>3</sub>,  $\delta$ , ppm) 5.81 (m, 2 H, CH=), 5.05 (m, 1 H, 12 $\beta$ -H), 4.97 (m, 4 H, =CH<sub>2</sub>), 4.71 (m, 1 H, 3 $\beta$ -H), 2.3 – 2.0 (m, 6 H, CH<sub>2</sub>CO<sub>2</sub>), 1.9 – 1.0 (m, 26 H, various CH), 1.42 (s, 9 H, *t*-butyl), 0.92 (s, 3H, C19), 0.85 (d,  $J$  = 8 Hz, 3H, C21 methyl), 0.71 (s, 3H, C18).

**Macrocycles 10.** Ring-closing metathesis of the preceding ester gave, after chromatography, the desired MCOs **10** as a colourless gum (67 %); FT-IR (ATR)  $\nu_{\max}$  1728  $\text{cm}^{-1}$  (ester carbonyl);  $^1\text{H}$  NMR (500 MHz,  $\text{CDCl}_3$ ,  $\delta$ , ppm) 5.38 (m, 2 H, CH=, *E*- and *Z*-isomers), 5.13 (m, 1 H, 12 $\beta$ -CH), 4.74 (m, 1 H, 3 $\beta$ -CH), 3.70 (s, 3 H,  $\text{OCH}_3$ ), 2.45 – 2.15 (m, 6 H,  $\text{CH}_2\text{CO}$ ), 2.1 – 1.0 (m, 52 H, various CH), 0.93 (s, 3 H, C19), 0.84 (d,  $J = 10$  Hz, 3 H, C21 methyl), 0.76 (s, 3 H, C18); MS MALDI ToF 734 and 750,  $\text{C}_{45}\text{H}_{74}\text{O}_6\text{Na}^+$  requires 734.1,  $\text{C}_{45}\text{H}_{74}\text{O}_6\text{K}^+$  requires 750.2. SEC: C1, 79% and C2, 21%.  $\text{C}_{45}\text{H}_{74}\text{O}_6$  requires C, 76.01; H, 10.49 %. Found: C, 76.22; H, 10.60 %

#### 4. Synthesis of Macrocycles 11.

*t*-Butyl deoxycholate:- This compound was prepared as described by Alexander *et al.*<sup>18b</sup> It was obtained as white crystals with m.p. 74-77 °C (from water/ethanol) (lit.,<sup>18b</sup> 72 - 76 °C); FT-IR (KBr)  $\nu_{\max}$  3390 br. (OH), 1730  $\text{cm}^{-1}$  (C=O).

*t*-Butyl Diundecanolyldoxycholate. The above ester was reacted with undec-10-enoyl and pyridine using the standard procedure. It was obtained in the form of a foam (102%) with FT-IR (KBr)  $\nu_{\max}$  1739  $\text{cm}^{-1}$  (C=O);  $^1\text{H}$  NMR (300 MHz,  $\text{CDCl}_3$ ,  $\delta$ , ppm) 5.81 (m, 2 H, CH=), 5.05 (m, 1 H, 12 $\beta$ -H), 4.97 (m, 4 H, =CH<sub>2</sub>), 4.71 (m, 1 H, 3 $\beta$ -H), 2.3 – 2.0 (m, 6 H,  $\text{CH}_2\text{CO}_2$ ), 1.9 – 1.0 (m, 26 H, various CH), 1.42 (s, 9 H, *t*-butyl), 0.92 (s, 3H, C19), 0.85 (d,  $J = 8$  Hz, 3H, C21 methyl), 0.71 (s, 3H, C18).  $\text{C}_{50}\text{H}_{84}\text{O}_6$  requires C, 76.87; H, 10.84 %. Found: C, 76.80; H, 10.67 %.

**MCOs 11.** These MCOs were prepared by ring-closing methathesis using the standard procedure.<sup>7</sup> Ring-closing metathesis was carried out using the general procedure. By  $^1\text{H}$  NMR spectroscopy, based on signals in the vinyl region, the crude product was estimated to contain about 8% of starting material and/or linear oligomers. Starting
